# Supplementary material for: Sonic hedgehog connects podocyte injury to mesangial activation and glomerulosclerosis
Source: JCI journal article supplement (doi:10.1172/jci.insight.130515), 2019-10-24
Supplement: sd1 [file 1]

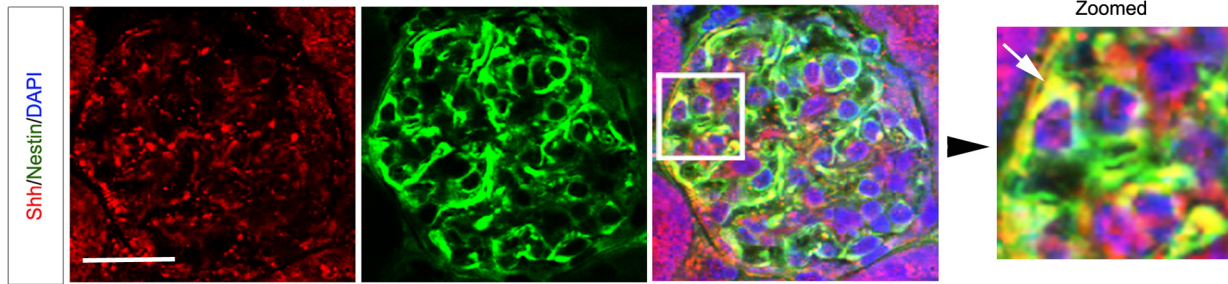

**Supplemental Figure 1.** Col-localization of Shh and nestin in glomerular podocytes in proteinuric CKD. Double immunofluorescence staining for Shh (red) and nestin (green), a podocyte-specific marker, in the injured glomeruli after ARDR injection. Boxed areas are enlarged and presented. Arrow indicates colocalization. Scale bar, 25  $\mu\text{m}$ .

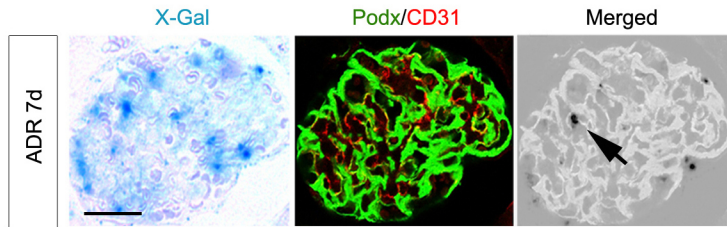

**Supplemental Figure 2. Hedgehog-responding cells in the glomeruli are non-endothelial and non-podocytes.** Co-staining of X-Gal with endothelial marker (CD31, red) and podocyte marker (podocalyxin, green) at 7 days after ADR. Black arrow indicates hedgehog-responding cells in the glomeruli. Scale bar, 25  $\mu$ m.

Mesangial cells

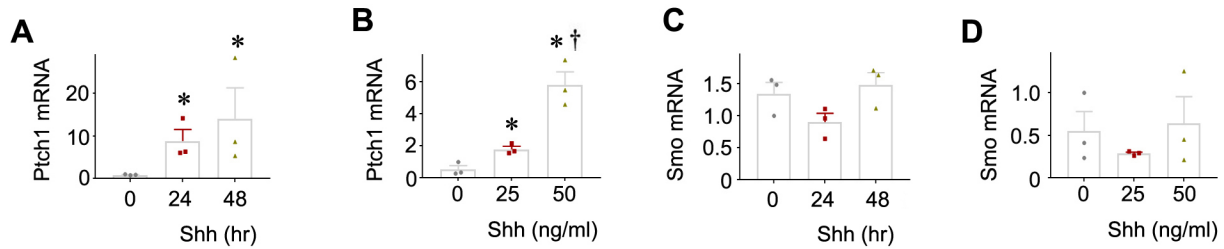

Podocyte

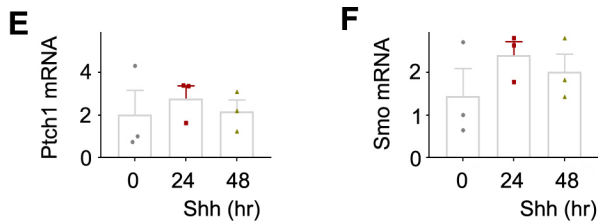

**Supplemental Figure 3. Expression of Shh receptors in mesangial cells and podocytes in vitro.** (A, B) qPCR shows that Shh induced Ptch1 mRNA expression in cultured mesangial cells in a dose- and time-dependent manner. \* $P < 0.05$  versus controls ( $n=3$ ), † $P < 0.05$  versus Shh at 25 ng/ml ( $n=3$ ,  $t$  test). (C, D) Shh did not significantly affect Smo mRNA expression in mesangial cells. (E, F) Shh did not affect Ptch1 and Smo mRNA expression in podocytes.

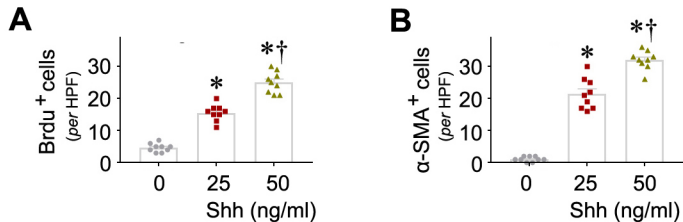

**Supplemental Figure 4. Quantification of BrdU and  $\alpha$ SMA-positive mesangial cells after Shh treatment.** Mesangial cells were incubated with different doses of Shh for 2 days. BrdU+ (**A**) and  $\alpha$ SMA+ (**B**) cells per high power field (HPF) were counted. Three fields per treatment were counted, and each treatments were repeated 3 times. \* $P < 0.05$  versus controls, † $P < 0.05$  versus 25 ng/ml of Shh. Student-Newman-Keuls test.

**A**

Dosage-Dependent

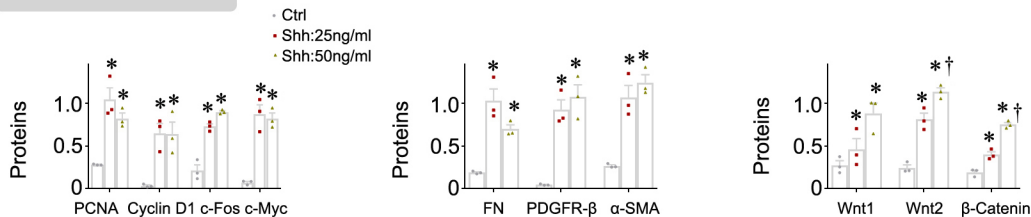**B**

Time-Dependent

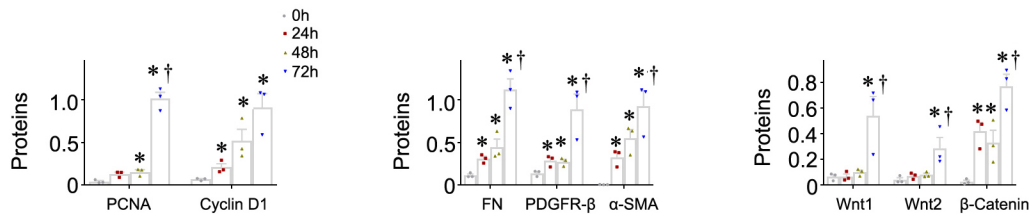

**Supplemental Figure 5. Quantification of protein expression in mesangial cells after Shh treatment.** (A) Mesangial cells were treated with different doses of Shh (0, 25 and 50 ng/ml) for 2 days. Expression of various proteins were assessed by Western blotting. \* $P < 0.05$  versus controls ( $n=3$ ), † $P < 0.05$  versus 25 ng/ml of Shh ( $n=3$ ). (B) Mesangial cells were treated with 50 ng/ml of Shh for various periods of time as indicated. Expression of various proteins were assessed by Western blotting. \* $P < 0.05$  versus controls ( $n=3$ ), † $P < 0.05$  versus 48 hr ( $n=3$ ). Student-Newman-Keuls test.

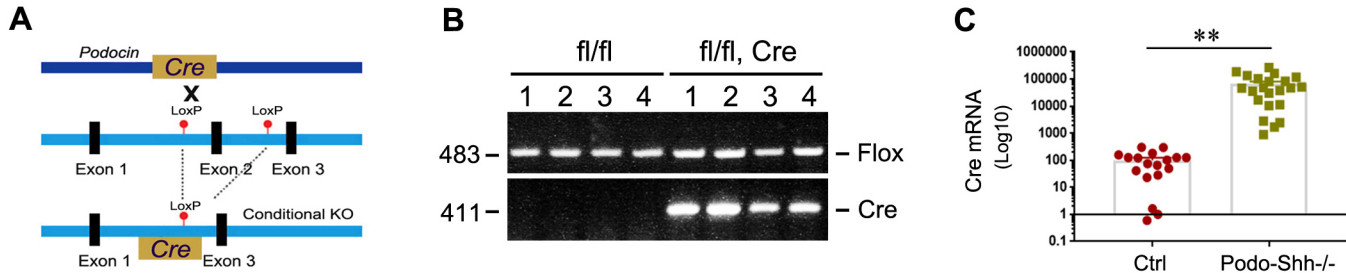

**Supplementary Figure 6.** Generation and characterization of conditional knockout mice with podocyte-specific ablation of *Shh*. (A) Experimental design. (B) Mouse genotyping. (C) qPCR analyses revealed a marked expression of Cre recombinase mRNA in Podo-Shh<sup>-/-</sup> mice. Student's *t* test.

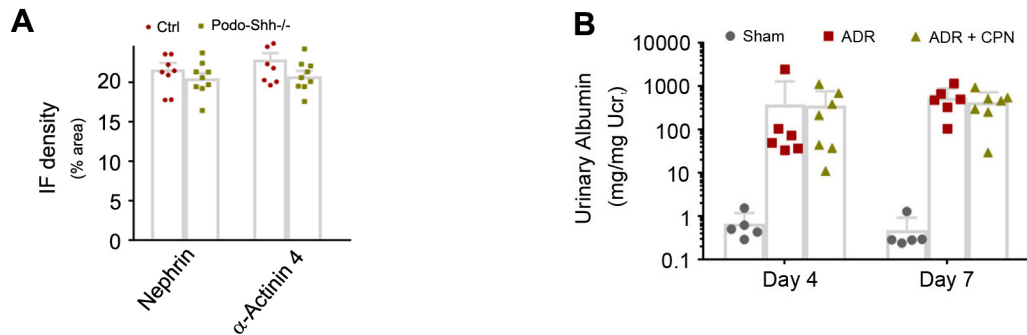

**Supplemental Figure 7. (A) Loss of Shh in podocytes does not affect nephrin and  $\alpha$ -actinin 4 expression in the glomeruli at 7 days after ADR injection.** Quantification of nephrin and  $\alpha$ -actinin 4 staining in control and podo-Shh<sup>-/-</sup> mice is shown as the relative IF intensity (percentage of area). n=5-7. **(B) Pharmacologic inhibition of Shh by CPN had little impact on urinary protein levels at day 4 and day 7 after ADR (n=5-7).**

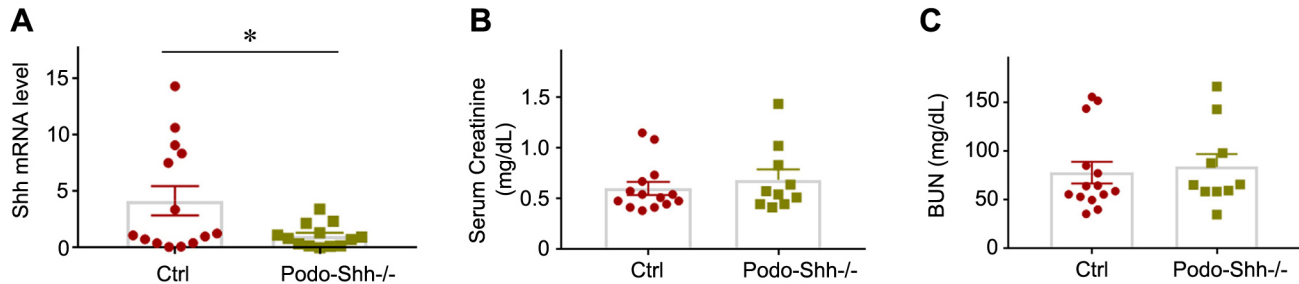

**Supplementary Figure 8.** Podocyte-specific deletion of Shh does not affect kidney function at 5 weeks after ADR injection. **(A)** qPCR showed the reduction of renal Shh mRNA in Podo-Shh<sup>-/-</sup> mice, compared to controls. \* $P < 0.05$ . **(B, C)** There was no difference in serum creatinine **(B)** and blood urea nitrogen (BUN) **(C)** between control and Podo-Shh<sup>-/-</sup> mice at 5 weeks after ADR injection (n = 10-15). Student's *t* test.



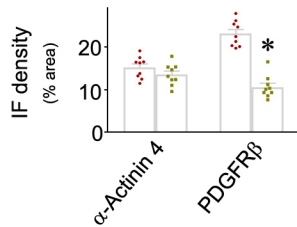

**Supplemental Figure 9. Quantification of  $\alpha$ -actinin 4 and PDGFR $\beta$  staining in control and podo-Shh $^{-/-}$  mice at 5 weeks after ADR.**

Relative IF intensity (% area) is shown. \* $P < 0.05$  versus controls (n=9). Student's  $t$  test.

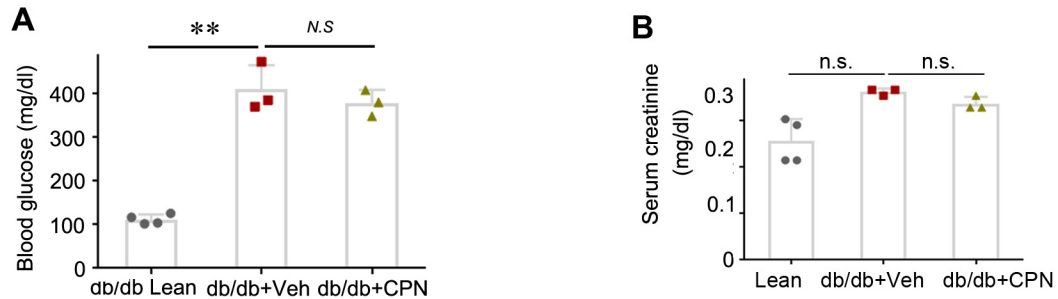

**Supplementary Figure 10.** Inhibition of Shh signaling by CPN does not affect blood glucose and serum creatinine in db/db mice.

(A) In 6 months old *db/db* mouse, administration with CPN for 2 weeks did not significantly affect blood glucose levels. (B) CPN did not significantly affect serum creatinine levels in db/db mice. Student-Newman-Keuls test.

**Supplemental Table 1. Demographic Characteristics of the Participants Included in Shh IHC staining**

| No. | Gender | Age | Diagnosis | Scr ( $\mu\text{mol/L}$ ) | e-GFR<br>( $\text{ml/min/1.73m}^2$ ) | Plasma<br>Albumin (g/L) |
|-----|--------|-----|-----------|---------------------------|--------------------------------------|-------------------------|
| 1   | Female | 63  | MN        | 59                        | 94.9                                 | 24.7                    |
| 2   | Male   | 52  | MN        | 85                        | 87.2                                 | 18.6                    |
| 3   | Female | 30  | MN        | 51                        | 130.5                                | 18                      |
| 4   | Female | 63  | MN        | 92                        | 56.8                                 | 23.6                    |
| 5   | Female | 38  | IgAN      | 52                        | 121.7                                | 37.5                    |
| 6   | Female | 61  | IgAN      | 115                       | 44.2                                 | 26.9                    |
| 7   | Female | 22  | IgAN      | 41                        | 178.8                                | 26.9                    |
| 8   | Male   | 49  | FSGS      | 278                       | 22.5                                 | 17.2                    |
| 9   | Female | 37  | FSGS      | 112                       | 50.5                                 | 33.3                    |
| 10  | Female | 48  | LN,SLE    | 56                        | 106.1                                | 34.8                    |

The representative micrographs of Shh staining from those patients are selected and presented in Figure 8. Abbreviation: Scr, serum creatinine; e-GFR, estimated glomerular filtration rate; MN, membranous nephritis; IgAN, IgA nephropathy; FSGS, focal and segmental glomerulosclerosis; LN, lupus nephritis; SLE, systemic lupus erythematosus.

**Supplemental Table 2. Demographic Characteristics of the Participants Included in the Shh ELISA**

| Characteristic                     | Efficacy Cohort      |                                                      |
|------------------------------------|----------------------|------------------------------------------------------|
|                                    | Healthy person(N=35) | CKD patients (N=27)                                  |
| <b>Gender--No.(%)</b>              |                      |                                                      |
| Male                               | 20(57.1)             | 13(48.1)                                             |
| Female                             | 15(42.9)             | 14(51.9)                                             |
| <b>Age at entry--years*</b>        |                      |                                                      |
| Mean±SEM                           | 42.38±3.05           | 40.13±3.48                                           |
| Range                              | 21-72                | 17-77                                                |
| <b>Clinical Diagnosis--No.(%)†</b> |                      |                                                      |
|                                    |                      | Primary: IgAN, FSGS, MN,<br>Secondary: LN, DKD, HTN. |

\*There were no significant between-group differences at baseline. The serum shh ELISA included data from all participants.

**Supplemental Table 3. Nucleotide sequences of the primers used for RT-PCR**

| Mouse gene     | Primer Sequence 5' to 3'   |                            |
|----------------|----------------------------|----------------------------|
|                | Forward                    | Reverse                    |
| Shh            | CGGCAGATATGAAGGGAAGA       | TCATCACAGAGATGGCCAAG       |
| Gli-1          | CTCGACCTGCAAACCGTAAT       | GTGGTACACAGGGCTGGACT       |
| Gli-2          | CTCATGGCAAGCCACCCCACC      | CCGCTTGCGGCTCAGTCGTG       |
| Gli-3          | ACATCTGGCGGAGCCCTCTCT      | CGGCCCTCATGATGTCTGGCA      |
| Smoothed       | CGGACTCGCAGGAGGAAGCG       | GGGTACGGCTGGGCAACTCC       |
| Ptch1          | CAGCCGAGACAAGCCCATCGAC     | ATGTTGGCCTGGGAGGCAGC       |
| Ptch2          | ACTGGTGGCCTTTGGGGCTCT      | GAGGTGTACGCAGCCTCTTCCC     |
| Hhip           | CAACCTGCCCAGCCACTGACC      | GACACCTCCATGACGGCACGC      |
| Nephrin        | ACCTGGACGACATGGAGAAG       | ATCGGACAACAAGACGAACC       |
| Podocin        | GGAAGCTGAGGCACAAAGAC       | AGCGACTGAAGAGTGTGCAA       |
| CD2AP          | AGGTAGAAGAAGGCTGGTGGA      | GTGAGGTAGGGCCAGTCAAA       |
| Podocalyxin    | GCCTTCACTTGCTCTTACGG       | AAAACCCGGTCATAACCACA       |
| WT1            | CATCCAGGCAGGAAAGTGT        | TGCAGTCAATCAGGTGTGCT       |
| Fibronectin    | CGA GGT GAC AGA GAC CAC AA | CTG GAG TCA AGC CAG ACA CA |
| $\alpha$ -SMA  | GAGGCACCACTGAACCCTAA       | CATCTCCAGAGTCCAGCACA       |
| FSP-1          | AGCTACTGACCAGGGAGCTG       | TCATTGTCCCTGTTGCTGTC       |
| Collagen I     | ATCTCCTGGTGCTGATGGAC       | ACCTTGTTTGCCAGGTTAC        |
| Collagen III   | AGGCAACAGTGGTTCTCCTG       | GACCTCGTGCTCCAGTTAGC       |
| $\beta$ -actin | CAGCTGAGAGGGAAATCGTG       | CGTTGCCAATAGTGATGACC       |
